# Supplementary material for: Crystalloid Coload Reduced the Incidence of Hypotension in Spinal Anesthesia for Cesarean Delivery, When Compared to Crystalloid Preload: A Meta-Analysis
Source: Hindawi journal article supplement (doi:10.1155/2017/3462529), 2017-01-01
Supplement: f1 [file 3462529.f1.pdf]

## Supplementary Table 1. Search strategy for PubMed and EMBASE

### PubMed

Searched on: April 17, 2017

Results: 202

---

| Search | Query                                                                                                                                                                                                                                                                                                                                                                                                                                                                                                                                                                                                                     |
|--------|---------------------------------------------------------------------------------------------------------------------------------------------------------------------------------------------------------------------------------------------------------------------------------------------------------------------------------------------------------------------------------------------------------------------------------------------------------------------------------------------------------------------------------------------------------------------------------------------------------------------------|
| #1     | "Cesarean Section"[mh]                                                                                                                                                                                                                                                                                                                                                                                                                                                                                                                                                                                                    |
| #2     | (Cesarean Sections[Title/Abstract]) OR Delivery, Abdominal[Title/Abstract]) OR Abdominal Deliveries[Title/Abstract]) OR Deliveries, Abdominal[Title/Abstract]) OR Caesarean Section[Title/Abstract]) OR Caesarean Sections[Title/Abstract]) OR Abdominal Delivery[Title/Abstract]) OR C-Section (OB)[Title/Abstract]) OR C Section (OB)[Title/Abstract]) OR C-Sections (OB)[Title/Abstract]) OR Postcesarean Section[Title/Abstract])                                                                                                                                                                                     |
| #3     | #1 OR #2                                                                                                                                                                                                                                                                                                                                                                                                                                                                                                                                                                                                                  |
| #4     | "Fluid Therapy"[mh]                                                                                                                                                                                                                                                                                                                                                                                                                                                                                                                                                                                                       |
| #5     | (Therapy, Fluid[Title/Abstract]) OR Fluid Therapies[Title/Abstract]) OR Therapies, Fluid[Title/Abstract]) OR Oral Rehydration Therapy[Title/Abstract]) OR Therapy, Oral Rehydration[Title/Abstract]) OR Rehydration Therapy, Oral[Title/Abstract]) OR Oral Rehydration Therapies[Title/Abstract]) OR Rehydration Therapies, Oral[Title/Abstract]) OR Therapies, Oral Rehydration[Title/Abstract]) OR Rehydration[Title/Abstract]) OR Rehydrations[Title/Abstract]) OR Oral Rehydration[Title/Abstract]) OR Oral Rehydrations[Title/Abstract]) OR Rehydrations, Oral[Title/Abstract]) OR Rehydration, Ora[Title/Abstract]) |
| #6     | #4 OR #5                                                                                                                                                                                                                                                                                                                                                                                                                                                                                                                                                                                                                  |
| #7     | crystalloid                                                                                                                                                                                                                                                                                                                                                                                                                                                                                                                                                                                                               |
| #8     | (coload[Title/Abstract]) OR co-load[Title/Abstract]) OR coload[Title/Abstract]) OR co-loading[Title/Abstract])                                                                                                                                                                                                                                                                                                                                                                                                                                                                                                            |
| #9     | (load[Title/Abstract]) OR loading[Title/Abstract]) OR preload[Title/Abstract]) OR preloading[Title/Abstract]) OR pre-loading[Title/Abstract])                                                                                                                                                                                                                                                                                                                                                                                                                                                                             |

---

---

|     |                                                                                                          |
|-----|----------------------------------------------------------------------------------------------------------|
| #10 | #6 OR #7 OR #8 OR #9                                                                                     |
| #11 | (randomized controlled trial[Publication Type] OR randomized[Title/Abstract] OR placebo[Title/Abstract]) |
| #13 | #3 AND #10 AND #11                                                                                       |

---

**EMBASE**

Searched on: May 4, 2017

Results: 52

---

| Search | Query                               |
|--------|-------------------------------------|
| #1     | 'cesarean section'/exp              |
| #2     | 'caesarean sections':ab,ti          |
| #3     | 'delivery, abdominal':ti,ab         |
| #4     | 'abdominal deliveries':ti,ab        |
| #5     | 'c-sections':ti,ab                  |
| #6     | 'c-section':ti,ab                   |
| #7     | #1 OR #2 OR #3 OR #4 OR #5 OR #6    |
| #8     | 'therapy, fluid':ti,ab              |
| #9     | 'fluid therapies':ti,ab             |
| #10    | 'therapies, fluid':ti,ab            |
| #11    | 'therapy, oral rehydration':ti,ab   |
| #12    | 'rehydration therapy, oral':ti,ab   |
| #13    | 'oral rehydration therapies':ti,ab  |
| #14    | 'rehydration therapies, oral':ti,ab |
| #15    | 'therapies, oral rehydration':ti,ab |
| #16    | 'rehydration':ti,ab                 |
| #17    | 'rehydration, oral':ti,ab           |
| #18    | 'oral rehydrations':ti,ab           |
| #19    | 'oral rehydration':ti,ab            |
| #20    | 'rehydrations':ti,ab                |

---

---

|     |                                                                                          |
|-----|------------------------------------------------------------------------------------------|
| #21 | #8 OR #9 OR #10 OR #11 OR #12 OR #13 OR #14 OR #15 OR #16<br>OR #17 OR #18 OR #19 OR #20 |
| #22 | 'load':ti,ab                                                                             |
| #23 | 'loading':ti,ab                                                                          |
| #24 | 'preload':ti,ab                                                                          |
| #25 | 'preloading':ti,ab                                                                       |
| #26 | 'pre-loading':ti,ab                                                                      |
| #27 | 'co-load':ti,ab                                                                          |
| #28 | 'co-load':ti,ab                                                                          |
| #29 | 'co-loading':ti,ab                                                                       |
| #30 | 'co-loading':ti,ab                                                                       |
| #31 | #22 OR #23 OR #24 OR #25 OR #26 OR #27 OR #28 OR #29 OR #30                              |
| #32 | 'crystalloid':ti,ab                                                                      |
| #33 | #21 OR #31 OR #32                                                                        |
| #34 | 'random':ti,ab                                                                           |
| #35 | 'placebo':ti,ab                                                                          |
| #36 | 'double-blind':ti,ab                                                                     |
| #37 | #34 OR #35 OR #36                                                                        |
| #38 | #7 AND #33 AND #37                                                                       |

---
